1 **TREATMENT OUTCOME AND ITS PREDICTORS AMONG DIABETIC PATIENTS**  
2 **ATTENDING AT SELECTED HOSPITALS OF SOUTHERN ETHIOPIA.**

3 <sup>1</sup>\*Bereket Beyene Gebre , <sup>1</sup>Dawit Hoyiso, <sup>1</sup> Dr Kinfe Woldu <sup>1</sup>

4 **Corresponding Author and first author**

5 <sup>1</sup>\*(Assistant professor in Adult health nursing at School of nursing, College of medicine  
6 and Health Science, Hawassa University, Sidama, Ethiopia)

7 **Email:** - [bereket2007beyene@gmail.com](mailto:bereket2007beyene@gmail.com)

8 <sup>1</sup>Dawit Hoyiso (Lecturer of Adult health nursing at School of nursing, College of  
9 medicine and Health Science, Hawassa University, Sidama, Ethiopia)

10 Email: - [dawithoyiso2006@gmail.com](mailto:dawithoyiso2006@gmail.com)

11 <sup>1</sup> Kinfe Woldu (Assistant professor of internal medicine at School of medicine, College  
12 of medicine and Health Science, Hawassa University, Sidama, Ethiopia).

13 Email: - [Knifichomed@gmail.com](mailto:Knifichomed@gmail.com)

14

15

16

17

18

19

20

21

## 22 **Abstract**

23 **Background:** Diabetes is one of the most serious health crises of the twenty-first century, with  
24 the World Health Organization (WHO) estimating that hyperglycemia is the third leading cause  
25 of early death globally, following high blood pressure and cigarette use. It is an important cause  
26 of blindness, kidney failure, lower limb amputation and other long-term consequences that  
27 impact significantly on quality of life. People get sick, die, and health care costs go up as a  
28 result.

29 **Objectives:** Diabetes mellitus treatment outcome and determinants in patients undergoing  
30 diabetes treatments in selected hospitals in southern Ethiopia, 2021.

31 **Methods:** A source population included all diabetic patients who attended chosen hospitals in  
32 southern Ethiopia. A cross-sectional study with an institutional focus was conducted in a few  
33 hospitals in southern Ethiopia. A pre-tested questionnaire was used to collect information about  
34 the patient. Following data cleaning and error checking, the data was loaded into Epi-data to  
35 eliminate errors before being exported to SPSS for analysis. The descriptive data were  
36 presented using tables and graphics. The result variable was evaluated using a logistic  
37 regression model to uncover predictors once the underlying assumptions of the regression  
38 analysis were verified. All independent variables with  $p < 0.25$  were considered for multivariate  
39 analysis. The level of significance was then set at  $p < 0.05$ , and the final model was AOR with  
40 95% CL.

41 **Result:** 277 (65.6%) of the whole sample had positive treatment outcomes. The existence of  
42 complication AOR 95%CI; 0.425 (0.217,.832), and elevated fasting blood glucose AOR  
43 95%CI; 0.080 (0.034, 0.188) were revealed to be independent predictors. Given the low size  
44 of treatment outcome, providing health information regarding sticking to prescribed medicine  
45 and monitoring fasting blood glucose level will result in a positive clinical outcome.

46 **Key words:** - Magnitude, treatment outcome, predictors, Diabetes, Ethiopia

47  
48  
49  
50  
51  
52  
53

54

## 55 **Introduction**

56 Diabetes mellitus is not a single disease entity, but rather a spectrum of metabolic illnesses  
57 characterized by hyperglycemia caused by abnormalities in insulin secretion, insulin action, or  
58 both (1). According to the IDF's 2015 survey, 8.8% of persons aged 20 to 79, or approximately  
59 415 million people worldwide, have diabetes. 75% of these persons lived in low- and middle-  
60 income countries. If current trends continue, by 2040, 642 million people (or one out of every  
61 ten people) will have diabetes. The most significant gains will occur in regions where  
62 economies are transitioning from low-income to middle-income status. In 2015, the IDF  
63 projected that 14.2 million persons aged 20 to 79 years had diabetes in Africa, reflecting a 3.2%  
64 prevalence (2). Poor diabetes outcome led to complications in many parts of the body and can  
65 increase the overall risk of dying prematurely. Heart attack, stroke, kidney failure, leg  
66 amputation, visual loss, and nerve damage are all possible consequences. Poorly controlled  
67 diabetes raises the risk of fetal mortality and other problems during pregnancy (3). According  
68 to the World Health Organization (WHO), hyperglycemia is the third leading cause of  
69 premature death worldwide, following excessive blood pressure and cigarette use (4). It causes  
70 sickness, death, and an increase in health-care costs. (5). It is the leading cause of end-stage  
71 renal disease (ESRD), traumatic lower extremity amputations, and adult blindness. It also  
72 predisposes to cardiovascular diseases. With an increasing global prevalence, diabetes will  
73 become a prominent cause of illness and mortality in the future. The goal of diabetes treatment  
74 is to reduce mortality and complications by stabilizing blood glucose levels. However, despite  
75 adequate medication, blood glucose levels may rise, leading in problems such as changes in fat  
76 metabolism, nerve damage, and eye disease (4, 6). Diabetes is a major cause of blindness,  
77 kidney failure, heart attacks, stroke and lower limb amputation (7).

78 Ethiopia is among the top four countries with the highest adult diabetic populations in sub-  
79 Saharan Africa. The total country prevalence of diabetes mellitus was 5.2%, the number of  
80 people with diabetes was 2,567,900, and the number of people with undiagnosed diabetes was  
81 1,960,300, according to the IDF 2017 Country Report. Diabetes claimed the lives of 31,000  
82 people, accounting for 81.8% of diabetes deaths among people under the age of 60. Diabetes-  
83 related patient attendance and medical admissions in major hospitals have been increasing. In  
84 Addis Ababa Ethiopia diabetes-related admissions in have increased from 7% in 2005 to 34%  
85 in 2009 (8). This necessitates a shift in healthcare goals as well as current data on treatment  
86 outcomes and predictors in Ethiopia. Diabetes complications caused by inadequate sugar

87 management in Ethiopia range from immediate complications such as DKA to chronic  
88 complications and mortality. However, there no research evidences in the study area showing  
89 treatment outcomes and predictors. Assessing the treatment outcome as good and poor based  
90 on glycemetic control will provide clinical evidence to bring good health outcome for the patient.  
91 So, the aim of this study is to assess treatment outcome and its predictors in the study area in  
92 which it provides input for health care providers and institution.

## 93 **Objectives**

### 94 **General objective**

95 To assess treatment outcome and its predictors among DM patients attending treatments at  
96 selected hospitals of Southern Ethiopia, 2021

### 97 **Specific Objective**

98 To determine treatment outcome of DM patients attending at selected hospitals of southern  
99 Ethiopia, 2021

100 To identify predictors of treatment outcome among DM patients attending treatments at  
101 selected hospitals of southern Ethiopia, 2021

## 102 **Methods and materials**

### 103 **Study area and period:**

#### 104 **Study area:**

105 The research was carried out at three hospitals: Hawassa University Comprehensive  
106 Specialized Hospital, Wolaita Sodo University Teaching Referral Hospital, and Nigist Ellen  
107 General Hospital. Hawassa University Comprehensive Specialized Hospital is a teaching  
108 hospital located 275 kilometers south of Addis Abeba in Hawassa town, Sidama region. Nigist  
109 Ellen Mohammed Memorial Hospital is a general hospital located in Hadiya Zone, 230  
110 kilometers from Addis Abeba. Wolaita Sodo University Teaching Referral Hospital is also  
111 located in Sodo town, which is 328 kilometers from Addis Abeba.

112 **Study period:** The study was conducted from October 24, 2021- February, 30, 2021

#### 113 **Study design**

114 A cross-sectional study design based on institutions was carried out at chosen hospitals in  
115 southern Ethiopia.

116 **Source population:** All diabetes patients that visited designated hospitals in southern  
117 Ethiopia during the study period.

118 **Study population:** All sampled diabetes patients who attended outpatient department at  
119 selected hospitals of southern Ethiopia during the study period.

#### 120 **Inclusion and exclusion criteria**

121 All diabetic patients who attended outpatient department at selected hospitals in southern  
122 Ethiopia who can give informed consent will be included. Whereas, those who are not  
123 volunteer have been excluded

#### 124 **Sample size**

125 Sample size calculation is based on the single population proportion formula in order to take  
126 maximum sample size with no study had done previously involving 3 different regional  
127 hospitals in SNNPR, Ethiopia

128 
$$N = [(Z_{\alpha/2})^2 P (1 - P)] / d^2$$
 is used.

129 N= is sample size,

130  $Z_{\alpha/2}$  is Z value which is 1.96 at 95% confidence interval,

131 P is the proportion of diabetes patients, which is 0.5, and d is the marginal error, which is 0.05.

132 In order to accommodate the broadest range of patients visiting diabetic clinics, the sample size  
133 will be 384 at 95% confidence interval and p value of 0.5. Adding 10% non-respondent rate,  
134 the final sample size will be 422.

#### 135 **Sampling Technique**

136 From all the hospitals in the southern region of Ethiopia, the research area was chosen at  
137 random using a lottery approach. Proportionate sample allocation was done to allocate  
138 samples for each hospital of Adare general hospital, Nigist Ellen general hospital and  
139 Wolayta sodo general hospital. As a result, every patient who had an appointment during  
140 the study period was chosen since patients attending health institutions are chosen at  
141 random until the maximum sample size was reached. So, exit interview was conducted at  
142 each hospital.

#### 143 **Variables**

##### 144 **Dependent Variable**

145 Treatment outcome

##### 146 **Independent Variables**

147 **Socio demographic variables:** - Age, Sex, educational status, marital status, income and  
148 job status.

149 **Behavioral Variables** are: - Alcohol drinking, cigarette smoking, Khat chewing, Physical  
150 activity practice, practices to prescribed diet regimen.

151 **Disease and medication related Variables** are: - Duration of Diabetes, Type of treatment,  
152 co-morbid illness, Fasting blood glucose level, DM control, Medication adherence

### 153 **Operational definition**

154 **Glycemic control:** patients were categorized based on the American Diabetic Association  
155 (ADA) 2017 guideline recommendation [8] into two groups:

156 **Good treatment outcome:** average fasting blood glucose of 80–130 mg/dL.

157 **Poor treatment outcome:** average fasting blood glucose of > 130 mg/dL.

### 158 **Data collection Instrument**

159 Data abstraction sheets, structured questionnaires, and observation checklists were utilized  
160 to collect data from the patient. Investigators created data abstraction sheets after evaluating  
161 various literature to extract important information from patient charts and laboratory results.  
162 A structured questionnaire was employed for the face-to-face interview. The World Health  
163 Organization guideline (WHO), (2012) was used to determine patient. The questionnaires  
164 are divided into six sections, which include socio-demographic information, questions about  
165 the patient's physical activity, and questions about the world to determine drug adherence.  
166 Laboratory and medication-related data are also included in the questionnaire. The  
167 questionnaire also includes laboratory and medication-related information. The information  
168 was gathered with the help of 11 BSc Nurses and three M.Sc. health professionals. At the  
169 end, the therapy outcome will be measured, which could be excellent or bad.

### 170 **Data processing and analysis**

171 Following a physical inspection of the collected data for completeness, the responses were  
172 cleaned, edited, coded, and entered into the computer with Epi-data version 3.1. Then the  
173 information had been exported to SPSS version 20.0. Before analyzing the data, it had been  
174 checked for missing values. Descriptive analysis with frequency had used to investigate the  
175 frequency of variables with independent variables. To find predictors of treatment outcome,  
176 binary logistic regression with 95% confidence intervals was performed to assess the  
177 connection of DM treatment outcome with independent covariates. Finally, a forward  
178 stepwise logistic regression model with all independent variables and a p value of 0.25 will  
179 be fitted to uncover independent predictors of DM treatment outcome.

180 **Data Quality**

181 To assure data quality, a well-constructed data collection tool was created, pretested in a  
182 hospital that was not chosen to evaluate the instrument's understandability and applicability,  
183 and data collectors and supervisors will receive three days of training. On each data  
184 collection day, the supervisor and lead investigator examined and confirmed the collected  
185 data for completeness. After double-checking the information, it was entered into Epi-data  
186 version 3.1 for double data entry verification.

187 **Ethical Considerations**

188 In order to follow the ethical and legal standards of scientific investigation, the study was  
189 conducted after approval of the proposal by Ethical Review Committee of Hawassa  
190 University. Authorities at chosen hospitals granted permission for the study to be carried  
191 out. Written informed consent was obtained from each study participant by assuring privacy  
192 and confidentiality throughout the data collection period in the Hospital. Individuals who  
193 were unwilling to participate from the beginning or at any part of the interview were  
194 allowed to withdraw. There was no risk or hazardous procedures putting the participants at  
195 harm.

196

197 **RESULT**

198 **Socio demographic characteristic of the respondents**

199 A total of 422 diabetes individuals were sampled, obtaining a 100% response rate. There were  
200 276 (62.3%) men and 304 (70.1%) married people among them. The participants' mean age  
201 was 46.51, with a standard deviation of 13.85. (See table 1 below)

202 Table 1. Socio demographic characteristics and factors associated with medication adherence  
203 for the respondents at selected hospitals of southern Ethiopia, 2021 (n=422)



| <b>S.N</b> | <b>Sociodemographic variables</b> | <b>Categories</b> | <b>Frequency</b> | <b>Percent</b> |
|------------|-----------------------------------|-------------------|------------------|----------------|
| 1          | Age                               | young age group   | 140              | 33.2           |
|            |                                   | middle age group  | 139              | 32.9           |
|            |                                   | old age group     | 143              | 33.9           |
| 1          | Sex                               | male              | 264              | 62.6           |
|            |                                   | female            | 158              | 37.4           |
| 2          | Address                           | urban             | 277              | 65.6           |
|            |                                   | rural             | 145              | 34.4           |
| 3          | Region                            | SNNPR             | 326              | 77.3           |
|            |                                   | Sidama            | 96               | 22.8           |
| 4          | Marital status                    | Single            | 82               | 19.4           |
|            |                                   | Married           | 304              | 72.1           |
|            |                                   | Widow/divorced    | 36               | 8.5            |
| 5          | Religion                          | protestant        | 264              | 62.6           |
|            |                                   | orthodox          | 104              | 24.6           |
|            |                                   | catholic          | 4                | 0.9            |
|            |                                   | Muslim            | 46               | 10.9           |
|            |                                   | others            | 4                | 0.9            |

|   |                     |                     |     |      |
|---|---------------------|---------------------|-----|------|
| 7 | Educational status  | illiterate          | 40  | 9.5  |
|   |                     | Read and write      | 49  | 11.6 |
|   |                     | grade1-8            | 113 | 26.8 |
|   |                     | grade10-12          | 97  | 23.0 |
|   |                     | College above       | 123 | 29.1 |
| 8 | Occupational status | Un employeed        | 11  | 2.6  |
|   |                     | retired             | 45  | 10.7 |
|   |                     | students            | 32  | 7.6  |
|   |                     | disabled            | 1   | .2   |
|   |                     | housewife           | 79  | 18.7 |
|   |                     | marchant            | 45  | 10.7 |
|   |                     | Daily labourer      | 4   | .9   |
|   |                     | farmer              | 68  | 16.1 |
|   |                     | Government employed | 95  | 22.5 |
|   |                     | Private employed    | 9   | 2.1  |
|   |                     | others              | 33  | 7.8  |
| 9 | Income              | low-income group    | 136 | 32.2 |
|   |                     | middle income group | 145 | 34.4 |
|   |                     | high income group   | 141 | 33.4 |

204

205 **Behavioural characteristics and factors**

206 Participants who did not drink alcohol or use cigarettes made up 95.7% and 98.1% of the  
 207 respondents, respectively. (See table 2 below.)

208 Table 2. Behavioural related characteristics for the respondents at selected hospitals of  
 209 southern Ethiopia, 2021 (n=422).

210  
 211  
 212  
 213

214 **Disease and medication related characteristics**

215 In this study 365 (82.4%) were type II diabetes and 277 (62.5%) had developed complication.  
 216 Regard to medication adherence and treatment outcome; 195 (44%) and 290 (65.5%) were  
 217 found to be poor and good adherence and outcome respectively. (See table 3 below)

218 Table 3. Disease and medication related characteristics for the respondents at selected  
 219 hospitals of southern Ethiopia, 2021 (n=422).

|    | <b>Disease and medication related factors</b> | <b>Categories</b> | <b>frequency</b> | <b>percent</b> |
|----|-----------------------------------------------|-------------------|------------------|----------------|
| 1. | Past hx of admission due to DM                | yes               | 284              | 64.1           |
|    |                                               | no                | 159              | 35.9           |

| S. N | <b>Behavioural factors</b> | Categories      | frequency | percent |
|------|----------------------------|-----------------|-----------|---------|
| 1    | Dietary practice           | poor practice   | 180       | 42.7    |
|      |                            | good practice   | 242       | 57.3    |
| 2    | Physical activity          | Inactive (poor) | 258       | 61.1    |
|      |                            | Active (good)   | 164       | 38.9    |
| 3    | Alcohol drinking           | yes             | 18        | 4.3     |
|      |                            | no              | 404       | 95.7    |
| 4    | Smoke cigarette            | yes             | 8         | 1.9     |
|      |                            | no              | 414       | 98.1    |
| 2    | Presence of complication   | yes             | 267       | 63.3    |

|    |                                              |                    |     |      |
|----|----------------------------------------------|--------------------|-----|------|
|    |                                              | no                 | 155 | 36.7 |
| 3  | Type of complication                         | DKA                | 195 | 46.2 |
|    |                                              | hknks              | 21  | 5.0  |
|    |                                              | others             | 44  | 10.4 |
|    |                                              | hypoglycemia       | 7   | 1.7  |
| 4  | Type of DM                                   | type1              | 143 | 33.9 |
|    |                                              | type2              | 272 | 64.5 |
|    |                                              | others             | 7   | 1.7  |
| 5  | MAT (Medication Adherence)                   | not adhered        | 16  | 3.8  |
|    |                                              | adhered            | 406 | 96.2 |
| 6  | RX 3(current DM medication intake)           | insulin            | 175 | 41.5 |
|    |                                              | Oral               | 247 | 58.5 |
| 9  | Blood glucose level                          | FBS between 60-140 | 132 | 31.3 |
|    |                                              | FBS >= 140         | 290 | 68.7 |
| 10 | Frequency of Blood glucose Level measurement | never              | 29  | 6.9  |
|    |                                              | once               | 31  | 7.3  |
|    |                                              | sometimes          | 167 | 39.6 |
|    |                                              | mostly             | 99  | 23.5 |
|    |                                              | always             | 96  | 22.7 |

220

221 **Prevalence of treatment outcome**

222 From the total sample the treatment outcome 277 (65.6%) were good. Whereas 145 (34.4%)  
 223 were found to be poor.

224 **Sociodemographic factors associated with treatment outcome**

225 From the sociodemographic variables affecting the respondents; only marital status and  
 226 educational status were found to be associated significantly with the treatment outcome. (See  
 227 table 4 below).

228 Table 4: - The sociodemographic factors associated with treatment outcome among\_the  
 229 respondents at selected hospitals of southern Ethiopia, 2021 (n=422).

230

| S.n | Variables          | category          | Treatment outcome |           | Exp(B) | 95% C.I.for EXP(B) |        |
|-----|--------------------|-------------------|-------------------|-----------|--------|--------------------|--------|
|     |                    |                   | Good              | poor      |        | Lower              | Upper  |
| 1   | Age                | young             | 88(31.8)          | 52(35.9)  |        |                    |        |
|     |                    | middle            | 90(32.5)          | 49(33.8)  | 0.921  | 0.565              | 1.502  |
|     |                    | old               | 99(35.7)          | 44(30.3)  | 0.752  | 0.459              | 1.232  |
| 2   | Sex                | male              | 172(62.1)         | 92(63.4)  | 1.060  | 0.699              | 1.607  |
|     |                    | Female            | 105(37.9)         | 53(36.6)  |        |                    |        |
| 3   | address            | Urban             | 190(68.6)         | 87(60.0)  | 0.687  | 0.452              | 1.043  |
|     |                    | Rural             | 87(31.4)          | 58(40.0)  |        |                    |        |
| 4   | Marital status     | single            | 58(20.9)          | 24(16.6)  | 3.103  | .659               | 14.625 |
|     |                    | married           | 188(67.9)         | 116(80.0) | 4.628  | 1.039              | 20.604 |
|     |                    | Widow/divorced    | 31(11.2)          | 5(3.5)    | 1.406  | .206               | 9.619  |
| 5   | Educational status | illiterate        | 22(7.9)           | 18(12.4)  | 1.977  | .949               | 4.120  |
|     |                    | Read and write    | 39(14.1)          | 10(6.9)   | .620   | .280               | 1.373  |
|     |                    | grade1-8          | 66(23.8)          | 47(32.4)  | 1.721  | 1.004              | 2.951  |
|     |                    | grade10-12        | 63(22.7)          | 34(23.4)  | 1.304  | .738               | 2.306  |
|     |                    | College and above | 87(31.4)          | 36(24.8)  |        |                    |        |
|     |                    | low               | 69(28.2)          | 31(22.0)  |        |                    |        |

|   |        |        |          |          |       |       |       |
|---|--------|--------|----------|----------|-------|-------|-------|
| 7 | Income | middle | 87(35.5) | 58(41.1) | 0.769 | 0.446 | 1.326 |
|   |        | high   | 89(36.3) | 52(36.9) | 1.141 | 0.708 | 1.838 |

231

232 **Behavioural factors affecting treatment outcome**

233 From the four behavioural variables included in the study; none of them were found to be  
234 associated significantly (See table 5 below).

235 Table 5: - Behavioural factors associated with treatment outcome among\_the respondents at  
236 selected hospitals of southern Ethiopia, 2021 (n=422).

| S.n | Variables         | category | Treatment outcome |           | Exp(B) | 95% C.I. for EXP(B) |       |
|-----|-------------------|----------|-------------------|-----------|--------|---------------------|-------|
|     |                   |          | Good              | poor      |        | Lower               | Upper |
| 1   | Alcohol           | yes      | 11(4)             | 7(4.8)    | 0.815  | 0.309               | 2.150 |
|     |                   | No       | 266(96)           | 138(95.2) |        |                     |       |
| 2   | Smoking           | yes      | 3(1.1)            | 5(3.4)    | 0.307  | 0.072               | 1.301 |
|     |                   | No       | 274(98.9)         | 140(96.6) |        |                     |       |
| 3   | Dietary practice  | good     | 112(40.4)         | 68(46.9)  | 1.317  | 0.877               | 1.97  |
|     |                   | poor     | 165(59.6)         | 77(53.1)  |        |                     |       |
| 4   | Physical activity | active   | 173(62.5)         | 85(58.6)  | 0.852  | 0.565               | 1.284 |
|     |                   | inactive | 104(37.5)         | 60(41.4)  |        |                     |       |

237

238

239 **Disease and medication related factors associated with treatment outcome**

240 From eight variables studied under disease and medication related factor; the following four  
241 factors called Past history of admission, Type of complication, Blood glucose Check-up and  
242 Blood glucose level were found to be associated significantly ( See table 6 below).

243 Table 6:- behavioural factors associated with treatment outcome among\_the respondents at  
244 selected hospitals of southern Ethiopia, 2021 (n=422).

245

| S.n | Variables                   | category                     | Treatment outcome |           | Exp(B) | 95% C.I.for EXP(B) |       |
|-----|-----------------------------|------------------------------|-------------------|-----------|--------|--------------------|-------|
|     |                             |                              | Good              | poor      |        | Lower              | Upper |
| 1   | Past history of admission   | yes                          | 164(59.2)         | 103(71.0) | 1.69   | 1.098              | 2.601 |
|     |                             | No                           | 100 (41.8)        | 55 (29)   |        |                    |       |
| 2   | Duration of DM              | < 10 years                   | 91 (56.1)         | 71 (43.9) | 0.27   | 0.13               | 1.32  |
|     |                             | Greater or equal to 10 years | 214(82.3)         | 46(17.7)  |        |                    |       |
| 3   | Presence of complication    | yes                          | 176(63.5)         | 91(62.8)  | 0.967  | 0.638              | 1.466 |
|     |                             | No                           | 94(36.5)          | 61(37.2)  |        |                    |       |
| 4   | Type of complication        | DKA                          | 121(77.1)         | 64(64.6)  | 0.465  | 0.259              | 0.833 |
|     |                             | hyperglycemia                | 36 (22.9)         | 35(35.4)  |        |                    |       |
| 5   | Type of DM                  | Type I                       | 90(32.5)          | 53(36.6)  | 1.472  | 0.276              | 7.857 |
|     |                             | Type II                      | 182(65.7)         | 90(62.1)  |        |                    |       |
|     |                             | others                       | 5(1.8)            | 2(1.4)    |        |                    |       |
| 6   | Medication adherence        | yes                          | 264(95.3)         | 142(97.9) | 2.331  | 0.653              | 8.315 |
|     |                             | no                           | 13(4.7)           | 3(2.1)    |        |                    |       |
| 7   | Medication intake           | Insulin                      | 115(41.5)         | 60(41.4)  | 1.006  | 0.669              | 1.512 |
|     |                             | oral                         | 162(58.5)         | 85(58.6)  |        |                    |       |
| 8   | Blood glucose Check- up/day | yes                          | 41(68.3)          | 19 (31.6) | 0.26   | 0.147              | 0.963 |
|     |                             | no                           | 322 (88.9)        | 40(11.1)  |        |                    |       |

|   |                     |                         |           |           |       |       |       |
|---|---------------------|-------------------------|-----------|-----------|-------|-------|-------|
| 9 | Blood glucose level | FBS Between 60-140mg/dl | 118(42.6) | 14(9.7)   |       |       |       |
|   |                     | FBS >= 140mg/dl         | 159(57.4) | 131(90.3) | 0.144 | 0.079 | 0.262 |

246

247 From the total of 19 variables studied under this study; only dietary practice, presence of  
 248 complication and having FBS >= 140 were found to be independently associated with  
 249 treatment outcome (See table 7).

250 Table 7. Independent predictors predicting treatment outcome among the respondents at  
 251 selected hospitals of southern Ethiopia, 2021 (n=422).

252

253

| Variables                | Category     | COR :95% C.I. for |       |       | AOR 95% C.I. for |       |       |
|--------------------------|--------------|-------------------|-------|-------|------------------|-------|-------|
|                          |              | EXP(B)            | Lower | Upper | EXP(B)           | Lower | Upper |
| Dietary practice         | Good         | 1.317             | 0.877 | 1.97  | 0.924            | 0.869 | 0.983 |
|                          | Poor         |                   |       |       |                  |       |       |
| Presence of complication | yes          |                   |       |       |                  |       |       |
|                          | No           | 0.967             | 0.638 | 1.466 | 0.425            | 0.217 | .832  |
| FBS                      | 60-140mg/dl  |                   |       |       |                  |       |       |
|                          | >= 140 mg/dl | 0.144             | 0.079 | 0.262 | 0.080            | 0.034 | 0.188 |

254

## 255 Discussion

256 According to this study, out of a total sample size of 422 people, 277 (65.6%) had a good  
 257 treatment outcome, while 145 (34.4%) had a bad treatment outcome. However, it is lower than  
 258 other studies done in debretabor in Ethiopia (71.4%) (9); Dessie Referral Hospital (70.8%)  
 259 (10); and Jimma University Teaching Hospital (70.9%) (11). This could be attributed to



260 differences in measuring scales, improved patient treatment outcomes, and research conducted  
261 in various health settings in southern Ethiopia.

262 This study also revealed that those who did not adhere to the suggested dietary practices had a  
263 7.6% higher AOR; 0.924; 95% (0.869, 0.983) risk of receiving a poor treatment outcome than  
264 those who did. As a result, this study revealed that dietary recommendations were closely  
265 linked to glycemic control in diabetes patients. The findings of this study are consistent with  
266 those of studies conducted in Gulf Cooperation Council countries (12) and Turkey (13), which  
267 found that low dietary compliance is significantly related to poor glycemic control, and it was  
268 also discovered to be associated independently (9).

269 It is clear that lifestyle changes, such as following the recommended diet, are critical methods  
270 for regulating patients' blood sugar levels. As a result, poor adherence to a recommended diet  
271 may make blood sugar control more difficult.

272 This study also found that individuals who experienced problems had a 57.5% higher AOR;  
273 0.425; and 95% (0.217, 0.832) worse treatment outcomes than those who did not.

274 Other investigations conducted in Ethiopia's south west tertiary hospitals (15) and Gondar  
275 hospital (14) discovered that complications were significantly associated with poor glycemic  
276 outcomes.

277 Other studies (15) at numerous public hospitals in western Ethiopia found a strong link  
278 between the prevalence of complications and poor glycemic control.

279 When compared to those with FBS between 60 and 140mg/dl, those with FBS  $\geq$  140mg/dl  
280 had 8% higher AOR; 0.080; and 95% (0.034,0.188) worse treatment outcomes. It is  
281 commonly understood that as an individual's FBS rises, so is the likelihood of a poor  
282 treatment outcome.

### 283 **CONCLUSION**

284 The magnitude of treatment outcome was determined to be poor in this study. The study also  
285 discovered that dietary practices, the existence of complications, and having FBS greater than  
286 140mg/dl all predicted independently.

### 287 **RECOMMENDATION**

288 Since the magnitude of treatment outcome were found to be low, the health care providers  
289 together with the responsible bodies should strengthen to provide toward improvement of  
290 factors affecting the patients by inhibiting them not to be in a state of good treatment.

### 291 **LIMITATION S**

292 There could have been recall bias in the prior 7 days while the individuals were answering  
293 questions about medication adherence as limitation for this study.

294 **STRENGTH AND WEAKNESS** The strength of this study was using the standard  
295 measurement to measure glycemic control to classify it as poor or good. On the other hand, the  
296 weakness of this study is due to its cross-sectional effect of the design

## 297 **ACRONYMS AND ABBREVIATION**

298 **CBE:** Community based education

299 **DM:** Diabetes mellitus

300 **HUCSH:** Hawassa University Comprehensive Specialized Hospital

301 **WHO:** World health organization

## 302 **DECLARATION**

### 303 **Ethics approval and consent to participate**

304 The study was implemented after the ethical review committee of Hawassa University  
305 College of Medicine and Health Science approved it. After promising secrecy, each study  
306 subject provided written informed consent in order for the study to begin. An individual  
307 who was uninterested in participating in the study was permitted to withdraw. We also  
308 guarantee that there were no dangers that put the participants in danger.

309

### 310 **Consent for publication**

311 We all agree on publication. I am the corresponding author and the first author of this  
312 finding.

### 313 **Consent to publish**

314 The consent form is held by the authors. Written informed consent was obtained from the  
315 participant.

### 316 **Availability of data and materials**

317 The study finding was putted in public repositories. So that the readers can access the data  
318 with the following cite called <https://www.hindawi.com/research.data/#statement>.

### 319 **Competing interests**

320 There is no opposing interest.

### 321 **Funding**

322 There is no need for funding. To conduct this research, the researcher received no specific  
323 funding and worked as a co-author on their own initiative to do research at the university  
324 hospital. It was primarily based on their prior hospital experience with us at the university.

325 There is no conflict of interest because there is no funding for this research. We also request  
326 a free publication cost because both writers live in Ethiopia, an impoverished sub-Saharan  
327 African country.

### 328 **Author's contribution**

329 The author contributes to the conceptualization and design, data collecting, data analysis  
330 and interpretation. They also help to draft articles, revise them, and approve manuscripts  
331 before they are published, and they are held accountable for the job they do on the text.

### 332 **Acknowledgement**

333 We would like to thank the Hawassa University College of Medicine and Health Science's  
334 Ethical Review Board for conducting an ethical clearance. We would also want to thank the  
335 hospitals for agreeing to direct the study in the chronic outpatient clinic. Furthermore, we  
336 would like to thank the study participants for their excellent contributions to the study.  
337 Furthermore, the pre-print of this work is available

### 338 **REFERENCE**

- 339 1. A.S.Fauci,D.L.Kasper,D.L.Longoetal.,Harrison's:Principles of Internal Medicine,  
340 McGraw-Hill, New York, NY, USA, 17th edition, 2008.
- 341 2. International Diabetes Federation. Diabetes Atlas. IDF. 7th edn. 2015. American Diabetes  
342 Association. Standards of Medical Care in diabetes. Diabetes Care. 2015;38(Suppl. 1)
- 343 3. World Health organization. Screening for Type 2 Diabetes. 2004;27(Suppl. ) Available  
344 from: [http://www.who.int/diabetes/publications/en/screening\\_mnc03.pdf](http://www.who.int/diabetes/publications/en/screening_mnc03.pdf) accessed on July  
345 5, 2016.
- 346 4. World Health Organization, "Diabetes fact sheet No 312," 2015,  
347 <http://www.who.int/mediacentre/factsheets/fs312/en>.
- 348 5. American Diabetes Association. Standards of Medical Care in diabetes. Diabetes Care.  
349 2015;38(Suppl. (7)
- 350 6. M. von Korff, W. Katon, E. H. B. Lin et al., "Potentially modifiable factors associated  
351 with disability among people with diabetes," Psychosomatic Medicine, vol. 67, no. 2, pp.  
352 233–240, 2005
- 353 7. Litwak L, Goh SY, Hussein Z, Malek R, Prusty V, et al. (2013) Prevalence of diabetes  
354 complications in people with type 2 diabetes mellitus and its association with baseline  
355 characteristics in the multinational study. Diabetol Metab Syndr 5: 57.
- 356 8. Ivanov TD, Ivanova M. American Diabetes Association. Standards of medical Care in  
357 Diabetes—2017. Kidneys. 2017;6(1):47–63.

- 358 9. Kassahun T, Eshetie T, Gesesew H. Factors associated with glycemic control among adult  
359 patient with type 2 diabetes mellitus; a cross-sectional study done in Ethiopia. BMC Res  
360 Notes. Bio Med Central 2016;9(1):78
- 361 10. Fiseha T, Alemayehu E, Kassahun W, Adamu A, Gebreweld A. Factors associated with  
362 glycemic control among diabetic adult out-patients in Northeast Ethiopia [Internet].  
363 BioMed Central BMC Res Notes 2018;11(316):4e9, [https://doi.org/10.1186/s13104-018-](https://doi.org/10.1186/s13104-018-3423-5)  
364 [3423-5](https://doi.org/10.1186/s13104-018-3423-5)
- 365 11. Alramadan MJ, Afroz A, Hussain SM, et al. Patient-related determinants of glycaemic  
366 control in people with type 2 diabetes in the Gulf Cooperation Council Countries: a  
367 systematic review. J Diabetes Res. 2018;2018:9389265.
- 368 12. Kayar Y, Ilhan A, Kayar NB, et al. Relationship between the poor glycemic control and  
369 risk factors, life style and complications. Biomed Res India. 2017;28(4):1581–6.
- 370 13. Gebre BB, Assefa ZM. Magnitude and associated factors of diabetic complication among  
371 diabetic patients attending Gurage zone hospitals, South West Ethiopia. BMC Res Notes.  
372 2019;12(1):780. doi:10.1186/s13104-019-4808-9
- 373 14. Fasil A, Biadgo B, Abebe M. Glycemic control and diabetes complications among  
374 diabetes mellitus patients attending at University of Gondar Hospital, Northwest Ethiopia.  
375 Diabetes Metab Syndr Obes. 2019;12:75. doi:10.2147/DMSO.S185614
- 376 15. Oluma A, Abadiga M, Mosisa G, Etafa W (2021) Magnitude and predictors of poor  
377 glycemic control among patients with diabetes attending public hospitals of Western  
378 Ethiopia. PLoS ONE 16(2): e0247634. <https://doi.org/10.1371/journal.pone.0247634>
- 379 16. <https://www.researchsquare.com/article/rs-917406/v1>
- 380
- 381

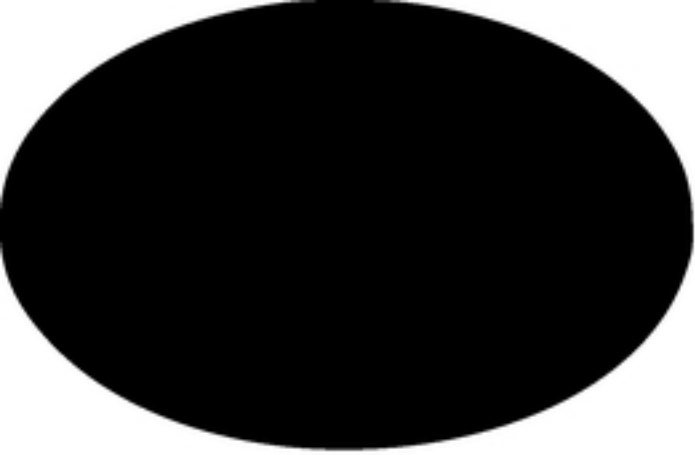

**Figure 1: Magnitude of good treatment outcome vs poor treatment outcome**

Figure
